# Supplementary material
Source: PubMed Central journal article supplement (PMC2996887)
Supplement: NIHMS253972-supplement-Supp_Table_S1.pdf [file NIHMS253972-supplement-Supp_Table_S1.pdf]

Supplemental Table S1 Kinesin Probes

| Gene        | Designed on EST | Primer Fwd 5'→3'-OH     | Taqman Probe 5'→3'-OH                    | Primer Rev 5'→3'-OH     |
|-------------|-----------------|-------------------------|------------------------------------------|-------------------------|
| KIF5A       | AF067179        | TGTCTTTGACCGCTCTTCC     | CCCAAACACCACTCAGGAGCAGGTTTAC             | TGCCATTGTAACCAGCAAGG    |
| KIF5B       | U86090          | AGAAGATGGTGTGGAGACGGA   | TGGAGCATGAGAGGCTGAAGGCTACAGAC            | CATAACCGTGAGCTCGTGCA    |
| KIF5C       | AF067180        | AGCATCAAAGTGATGTGCCG    | AAGCGGAGATCCTCCGCGGG                     | ATCACCACCGTCTCCTCGC     |
| KIF3A       | D12645          | GCAAAAACCTGGAGCCACAGG   | CAGCGCCTCAAGGAAGTACCAAAATC               | TTTCCATCCACCAAGGCAG     |
| KIF3B       | D26077          | AACCTGTCCCTTTCCGCCT     | TTGTAGATGGCAAAAGCACCCATATTCCA            | TGGAGAAGCCTGGTCAGCTT    |
| KIF3C       | AF013116        | TTCTGGCTCTGGGAGACTGC    | TGAAGGTGAGAGGTGTCTAATGGTGTGG             | AGAGAGAATCGAGCACAGCTCA  |
| KIF17       | AB001424        | CGTATGGGCAGACAGGCAGT    | TCTTTCACCATGCAGGGACTGCCA                 | AAACACGTGCTCGAAGGCTC    |
| KIF1A       | D29951          | ATGACGCTCTCTGCCTACATTGA | AGCTGTCTATCACCAGGACTTCTGCATG             | CTTGGCGTCCCAGAGTAGA     |
| KIF1B alpha | D17577          | ATTGTGACCTTGGAGCCCTG    | AGCGCTCAGAAACATACGTGAATGGCA              | CCCATGATGATACGGTTCCC    |
| KIF1B beta  | AB023656        | AACTTGCGTGTGGTGAACA     | CCGCTTCTTGGACCCATGTGGAGG                 | GCATCCATCAGGTCAGCGAT    |
| KIF1C       | AB001456        | TGAAATCTATTGCGAGCGA     | ACGAGACCTCTTGAACCCCAAGAGTCG              | GTCTTGCACGTACGGGCCTA    |
| KIF13A      | AB037923        | CAGGAACCATTCAGAACGC     | AGAGCGGGAGTCTTGAAGTGGTCGACA              | GTGAATGACTTCGCGCCTG     |
| KIF13B      | AB001430        | AGCACAGTGTGTGGGACCC     | ACGTGGATGGACTTTCTAAACTGGCTGTCA           | CCGAGACTGTTCGCCCTCAG    |
| KIF14       | AB001431        | CACCGGCATGAACGATAAAA    | CTCCCGTCTCATTTCTGTTCACCC                 | TGTGGTCATGTTCTCTCCCT    |
| KIF16A      | AB001425        | TGGAGGCAGGGATAGCAAAC    | ATCACAGCAGCCACCCATGTTACAG                | GATTGCCTGTGTGAGTGGGA    |
| KIF16B      | AB001423        | AAGAGTCCGTGAGCATCCCA    | ATTTATCCAAGCATTTAGTCCAGAACTACAGTGTG      | TTCTGCGTCCATGAGTTCC     |
| KIF4        | D12646          | CGCTCTGGGATCAATTTGA     | ACTTGGCGGTTAAAGCTCCGGTTGG                | CGGGTAACTCACAAACTAAACG  |
| KIF7        | AB001435        | CCTCCCTGCATGAAGATGAAC   | CCATGGCTGAGGCTTCAAGCTCA                  | TACATGCACCAGGCAGTCCA    |
| KIF21A      | AF202892        | GCAAGTCCCAAATGCACACA    | ACTGGGTGTGTGCCCTGGGCCT                   | AGAGTTTCAAGATGCCCTC     |
| KIF21B      | AF202893        | TCCCCACCTCGATCTGAG      | TCACGTGACCTGACAGTGAAGTCTGGAG             | GTCCTAACTCAAGGGTGGGC    |
| KIF11       | AB001427        | CAGACTGGCACTGGAAAACCTTT | TGAAAGTCCACCTAATGAAGTATGTACCTGGGAGG      | GTGCGTGAATTATACCAGCC    |
| KIF20A      | Y09632          | GAGCGCTGCAACATCAAAA     | AGTGGTGAGCGGCTAAAGGAGGCAG                | TGTCGCAGGGCAGCAATAC     |
| KIF20B      | AB054030        | CCGTGAACAGTTGTGACCAGTC  | AAGTATTCTGTGTGGGTTTCTTTCTTTGAAATTTACAATG | GGACACAGGAACAACAATAATCG |
| KIF23       | AK013939        | CGGAGGAGCTTTTGGAGTT     | AAAAGAGACGCATTGCTAACACCCATTGTA           | GCTGAACACGCTATGTGAACG   |
| KIF10       | AB001426        | AATTCGGGAAGACACCAATAGG  | CTGATCTCACAGAAGAAGTGGTTTATACAGCAGAAATG   | TTTCTCCTGTTGCGAGCCAT    |
| KIF18A      | AB054024        | GATCAGCTGCTGAACCTGGG    | TCATGTACTGACAATGCTGGACCTTTTCAA           | TGACACGGCAGTGTACTACTC   |
| KIF18B      | AB054025        | GAGCAGATCCATGACCTCCTG   | CCAAAGGACCCCTCACCATCCGTG                 | GCTGGCTGGTGGAAAGAAAG    |
| KIF19A      | AB054026        | GGGAAGACCTACACCATGCTG   | CAGTACCACGAGCCAGGCATCTATG                | ATGTCATTGCTGGTCTCCTCG   |
| KIF9        | AJ132889        | ATGCGGTTTCTCAAGCCCTT    | TACGGGCAGACAGGAGCCGGC                    | ATTCTCCGTTGCCCTGTCT     |
| KIF6        | AB001434        | GCAGTTGCAAAAGGACAGCA    | TACACGACACATTTCTTACTTGGAAATCTACAACGAAT   | CTTCGTGTCTGGGATCCAGC    |
| KIF22       | AF013119        | AGACACACACAATGCTGGGC    | CAGAGCAACCTGGAGTGATTCTCCTCGG             | CCGTCCCTCAGCACTCTCTT    |
| KIF26A      | AB054031        | TTCAGGACACCCAAATCTCCG   | CGTGTACTCCTGGGAGGACCCCTG                 | CTTCTCTGCTGTGGGTGCAC    |
| KIF26B      | AB053955        | TGTGAAGACCCCGCAGAGA     | CCTTCTTCTGGACCGGCCA                      | GAGTTGCGGTGGTCATCCTC    |
| KIF15       | AB001432        | CGGCGTCAGTCGGACTGTAT    | AGAAGGGAGTCTTTGTGGTCCGGTGCA              | CTGGTAGTCTCGGCAGCTG     |
| KIF2A       | D12644          | TGTAAAGAACCAGCGGACTG    | ACCTCCCGGAGAGATAATAGAGTGGTTG             | CAGGAAGCTGACTAGGCCGT    |
| KIF2C       | AB054029        | TCTGGCTACCTGTGCTGATGA   | CGTCAAGATGATCAACATGGGCAGAGC              | GGGAGCAGGAGGAATTGGAG    |
| KIF24       | AB054028        | GCCTTCGAGAGCTCCAAGTG    | ACAGTGTGGAGTACTCCTACAGGTGATCTTAAAGG      | GTCTGCGTGTGACACCAAGTGG  |
| KIFC1       | AF013117        | GCGAGTGCAGATCCGTC       | AGCCAGGGAGTGGAGGCTTACTGTCA               | CAGGGCCTCCACCTCTTTCT    |
| KIFC2       | D49545          | AGGACGCCAGCATGTCTT      | CCTGGACTGGGTCTTCTCTCAAGATGC              | GGAGGCAGGACAACACAGCT    |
| KIFC3       | AF013118        | CAAGTACCGCCGGAACTAC     | CTGCGCAAGAAATGCCATAACGAGC                | TGGTGAAGTGGCCGACTC      |
