# Supplementary material
Source: PubMed Central journal article supplement (PMC2996887)
Supplement: NIHMS253972-supplement-Supp_Table_S2.pdf [file NIHMS253972-supplement-Supp_Table_S2.pdf]

Supplemental Table S2 Cell-Type Specific Marker Probes

| Gene                    | Primer Fwd 5'->3'-OH     | Taqman Probe 5'->3'-OH           | Primer Rev 5'->3'-OH |
|-------------------------|--------------------------|----------------------------------|----------------------|
| 18S (internal standard) | CGCCTACCACATCCAAGGAA     | CAGCAGGCCGCGCAAATTACCCA          | GGGCTCGAAAGAGTCCTGT  |
| NF-H                    | ACACAGATGCTATGCGCTCG     | CCCAAGAGGAGATAACTGAGTACCGGCG     | CTCCTTGGTGCTTTTCAGGG |
| Nf-L                    | GAGGAAGAGATCGCCGAGCT     | AGGTGTCCTCCAAGCCCGACCTC          | TCCTTGAGAGCGGCGG     |
| Nf-M                    | GATTTAGCACATTTTCAGGAAGCA | TGTACACACACCCGACAGCCCTCAGTCAC    | GGCTCGACTTTGGTCTTCTG |
| PLP                     | GCAGTCTCTGCGCTGATGC      | AGAATGTATGGTGTCTCCCATGGAATGCTTTT | GGCTGTTTTCAGATGGACA  |
| MBP                     | AGCAAGTACCATGGACCATGC    | CATGGCTTCTCCCAAGGCACAGAG         | CACCCCTGTACCAGCTAAAG |
| GFAP                    | GATGGAGCTCAATGACCGCT     | CTACATCGAGAAGTCCGCTTCCTGGAAC     | TGGCTCGAAGCTGGTTCAG  |
| Nestin                  | ACCAGCGACATGGAGGGT T     | TTTTCGATGTGGGAGCTCAATCGACG       | CTGCTCCTCCAGCGTCTTG  |
| beta2/beta3 tubulin     | CAGTTCACAGCCATGTTCCG     | AAGGCCTTCTCCACTGGTACACGC         | TCATTCATGTTGCTCTCGGC |
