# Supplementary material
Source: PubMed Central journal article supplement (PMC2996887)
Supplement: NIHMS253972-supplement-Supp_Table_S3.pdf [file NIHMS253972-supplement-Supp_Table_S3.pdf]

Supplemental Table S3

| Family                                          | Members          | E16       | 4DIV      | 7DIV      | 14DIV     | Adult     |
|-------------------------------------------------|------------------|-----------|-----------|-----------|-----------|-----------|
| <b>Kinesin-1</b><br>(Conventional Kinesin, KHC) | KIF5A            | 10.7 ±0.4 | 9.7 ±0.3  | 10.0 ±0.6 | 9.4 ±0.4  | 9.5 ±0.4  |
|                                                 | KIF5B            | 8.6 ±0.5  | 9.9 ±0.5  | 8.8 ±0.5  | 9.2 ±0.5  | 8.3 ±0.5  |
|                                                 | KIF5C            | 13.6 ±1.3 | 12.2 ±1.1 | 11.5 ±1.3 | 11.6 ±1.1 | 11.9 ±1.1 |
| <b>Kinesin-2</b>                                | KIF3A            | 11.8 ±0.6 | 11.7 ±0.6 | 10.6 ±0.7 | 10.8 ±0.6 | 11.5 ±0.6 |
|                                                 | KIF3B            | 13.3 ±0.5 | 13.5 ±0.5 | 12.4 ±0.7 | 12.4 ±0.5 | 14.0 ±0.5 |
|                                                 | KIF3C            | 8.9 ±0.9  | 8.5 ±0.7  | 7.4 ±0.9  | 7.0 ±0.7  | 8.0 ±0.7  |
|                                                 | KIF17            | 16.9 ±0.7 | 16.7 ±0.7 | 15.2 ±0.8 | 13.5 ±0.7 | 14.1 ±0.7 |
| <b>Kinesin-3</b>                                | KIF1A            | 9.1 ±0.8  | 10.4 ±0.8 | 9.2 ±1.0  | 8.5 ±0.8  | 8.9 ±0.8  |
|                                                 | KIF1B alpha      | 9.1 ±0.6  | 10.3 ±0.6 | 9.2 ±0.8  | 8.9 ±0.6  | 8.8 ±0.6  |
|                                                 | KIF1B beta       | 7.2 ±0.5  | 8.0 ±0.5  | 6.9 ±0.6  | 7.4 ±0.5  | 6.6 ±0.5  |
|                                                 | KIF1C            | 13.0 ±0.6 | 15.7 ±0.6 | 15.2 ±0.8 | 14.9 ±0.6 | 12.2 ±0.6 |
|                                                 | KIF13A           | 12.4 ±0.5 | 12.7 ±0.5 | 11.1 ±0.6 | 12.6 ±0.5 | 12.2 ±0.5 |
|                                                 | KIF13B/GAKIN     | 14.0 ±0.3 | 15.2 ±0.3 | 15.7 ±0.4 | 16.0 ±0.3 | 13.8 ±0.3 |
|                                                 | KIF14            | 14.5 ±0.8 | 19.0 ±0.9 | 18.9 ±1.0 | 19.6 ±0.8 | 20.2 ±0.8 |
|                                                 | KIF16A           | 15.5 ±0.6 | 18.2 ±0.6 | 18.5 ±0.7 | 18.4 ±0.6 | 18.1 ±0.7 |
| KIF16B                                          | 17.6 ±0.5        | 18.0 ±0.5 | 17.1 ±0.6 | 17.3 ±0.5 | 17.5 ±0.5 |           |
| <b>Kinesin-4</b>                                | KIF4             | 18.6 ±0.8 | 21.2 ±0.8 | 19.9 ±1.0 | 20.3 ±0.8 | 19.9 ±1.0 |
|                                                 | KIF7             | 15.7 ±0.8 | 16.8 ±0.7 | 15.8 ±0.8 | 16.1 ±0.7 | 14.9 ±0.7 |
|                                                 | KIF21A           | 10.6 ±0.8 | 11.7 ±0.7 | 10.5 ±0.8 | 10.7 ±0.8 | 8.0 ±0.8  |
|                                                 | KIF21B           | 11.8 ±1.3 | 10.3 ±1.1 | 9.7 ±1.3  | 9.1 ±1.1  | 13.2 ±1.1 |
| <b>Kinesin-5</b>                                | KIF11/Eg5        | 12.8 ±0.3 | 16.3 ±0.3 | 17.1 ±0.4 | 18.1 ±0.3 | 18.3 ±0.4 |
| <b>Kinesin-6</b>                                | KIF20A           | 13.3 ±0.8 | 16.7 ±0.8 | 16.6 ±1.0 | 17.1 ±0.8 | 18.2 ±0.8 |
|                                                 | KIF23/MKLP1/CHO1 | 13.1 ±0.6 | 17.2 ±0.5 | 16.6 ±0.6 | 18.9 ±0.5 | 20.2 ±0.5 |
| <b>Kinesin-7</b>                                | KIF10/CENP-E     | 13.6 ±0.6 | 15.6 ±0.7 | 16.3 ±0.7 | 16.5 ±0.6 | 18.6 ±0.6 |
| <b>Kinesin-8</b>                                | KIF18A           | 14.4 ±0.7 | 17.2 ±0.5 | 16.7 ±0.7 | 16.9 ±0.5 | 19.1 ±0.5 |
|                                                 | KIF18B           | 14.2 ±0.7 | 17.4 ±0.7 | 18.5 ±0.9 | 19.6 ±0.7 | 21.5 ±0.7 |
|                                                 | KIF19A           | 17.1 ±0.8 | 17.6 ±0.7 | 16.9 ±0.8 | 17.1 ±0.7 | 15.3 ±0.7 |
| <b>Kinesin-9</b>                                | KIF9             | 14.9 ±0.8 | 15.7 ±0.8 | 15.0 ±1.0 | 13.8 ±0.8 | 15.5 ±0.8 |
| <b>Kinesin-10</b>                               | KIF22            | 13.7 ±1.0 | 16.8 ±0.8 | 16.2 ±1.0 | 17.2 ±0.8 | 17.9 ±0.8 |
| <b>Kinesin-11</b>                               | KIF26A           | 18.9 ±0.4 | 21.8 ±0.4 | 21.6 ±0.5 | 22.6 ±0.4 | 21.7 ±0.4 |
|                                                 | KIF26B           | 16.5 ±0.9 | 17.1 ±0.8 | 16.1 ±1.0 | 16.7 ±0.8 | 18.4 ±0.8 |
| <b>Kinesin-12</b>                               | KIF15            | 12.5 ±0.7 | 16.1 ±0.7 | 17.0 ±0.8 | 18.2 ±0.7 | 19.0 ±0.7 |
| <b>Kinesin-13</b>                               | KIF2A/MCAK       | 8.4 ±0.5  | 8.7 ±0.5  | 7.3 ±0.6  | 7.7 ±0.5  | 8.5 ±0.5  |
|                                                 | KIF2C            | 16.2 ±0.9 | 17.9 ±0.8 | 16.8 ±0.9 | 17.4 ±0.8 | 19.8 ±0.9 |
|                                                 | KIF24            | 15.2 ±0.5 | 18.4 ±0.5 | 17.6 ±0.6 | 17.9 ±0.5 | 18.6 ±0.5 |
| <b>Kinesin-14</b>                               | KIFC1            | 11.9 ±1.0 | 15.6 ±1.0 | 14.8 ±1.2 | 15.1 ±1.0 | 15.4 ±1.0 |
|                                                 | KIFC2            | 12.2 ±0.8 | 11.6 ±0.8 | 9.4 ±1.0  | 8.2 ±0.8  | 8.5 ±0.8  |
|                                                 | KIFC3            | 12.5 ±1.2 | 12.4 ±0.9 | 10.7 ±1.1 | 10.5 ±0.9 | 10.8 ±0.9 |

**Cell-Type Specific Markers**

|                           |                     |           |           |           |           |           |
|---------------------------|---------------------|-----------|-----------|-----------|-----------|-----------|
| <b>Neurons</b>            | NF-L                | 13.1 ±0.7 | 11.3 ±0.7 | 7.9 ±0.9  | 6.2 ±0.7  | 7.2 ±0.7  |
|                           | NF-M                | 12.1 ±0.7 | 12.2 ±0.7 | 9.6 ±0.8  | 7.5 ±0.7  | 9.5 ±0.7  |
|                           | NF-H                | 16.9 ±0.7 | 14.9 ±0.7 | 11.7 ±0.8 | 9.5 ±0.7  | 10.7 ±0.7 |
| <b>Oligodendrocytes</b>   | PLP                 | 14.8 ±1.0 | 13.7 ±1.0 | 11.4 ±1.2 | 13.1 ±1.0 | 7.6 ±1.0  |
|                           | MBP                 | 12.7 ±0.5 | 11.5 ±0.5 | 9.2 ±0.6  | 10.3 ±0.5 | 5.9 ±0.5  |
| <b>Astrocytes</b>         | GFAP                | 13.0 ±0.5 | 10.5 ±0.5 | 10.4 ±0.6 | 10.7 ±0.5 | 10.1 ±0.5 |
| <b>Neural progenitors</b> | Nestin              | 12.9 ±0.8 | 18.1 ±0.8 | 18.1 ±1.1 | 19.8 ±0.8 | 18.2 ±0.8 |
| <b>Ubiquitous</b>         | beta2/beta3 tubulin | 3.9 ±0.6  | 4.1 ±0.6  | 2.7 ±0.8  | 4.0 ±0.6  | 6.7 ±0.6  |
