# Supplementary material
Source: PubMed Central journal article supplement (PMC2996887)

# Supplementary Figure S1

## A E16 Tissue vs. Mature Cultures

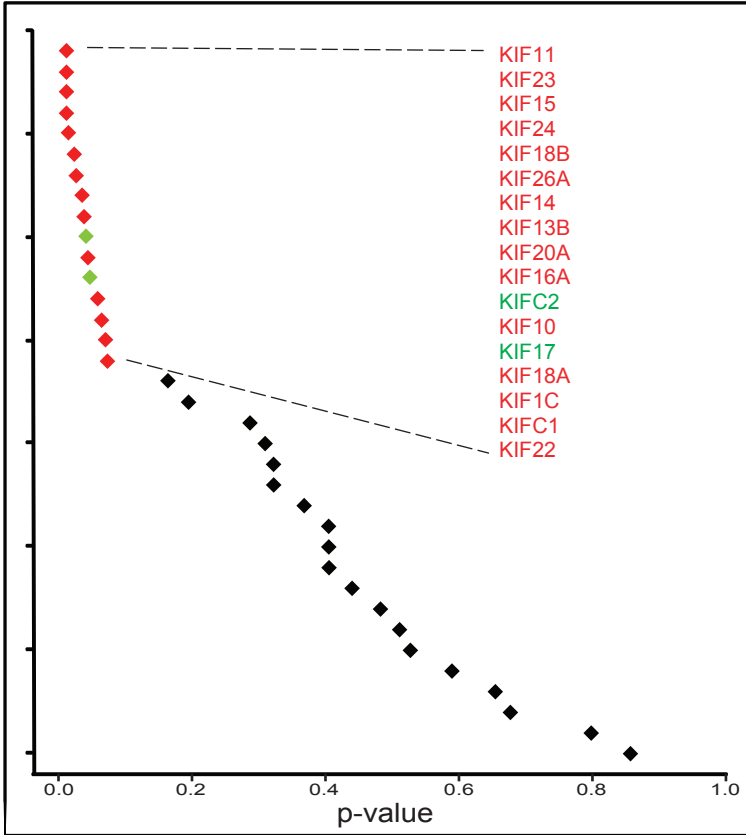

## B E16 vs. Adult Tissue

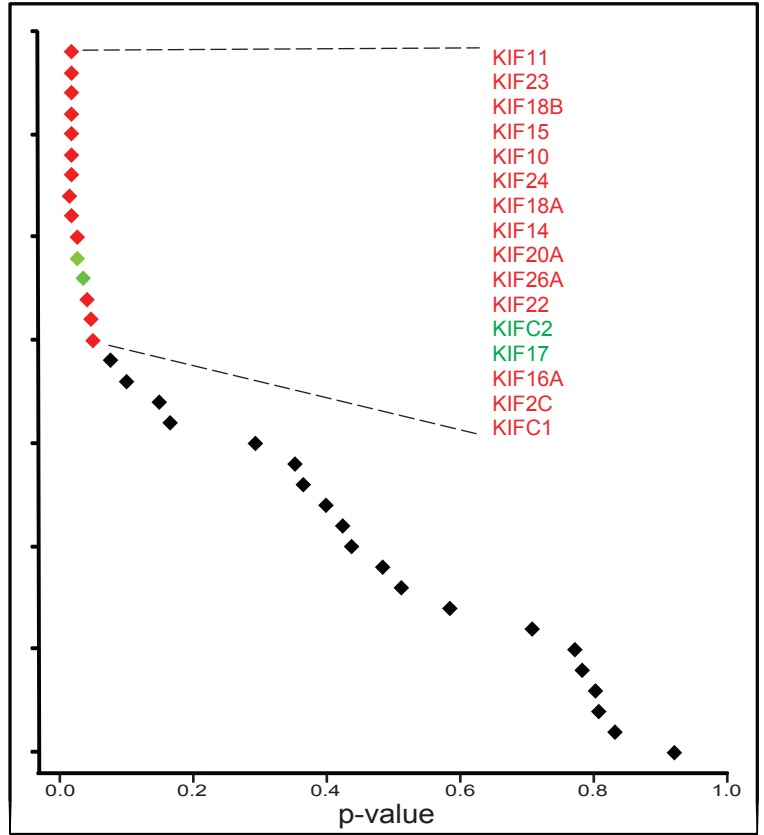

Supplement: NIHMS253972-supplement-Supp_Fig_S1.pdf [file NIHMS253972-supplement-Supp_Fig_S1.pdf]
